# Supplementary material for: Extraction Efficiency and Alpha-Glucosidase Inhibitory Activities of Green Tea Catechins by Different Infusion Methods
Source: MDPI journal article supplement (doi:10.3390/foods12132611), 2023-07-06
Supplement: s1 [file s1]

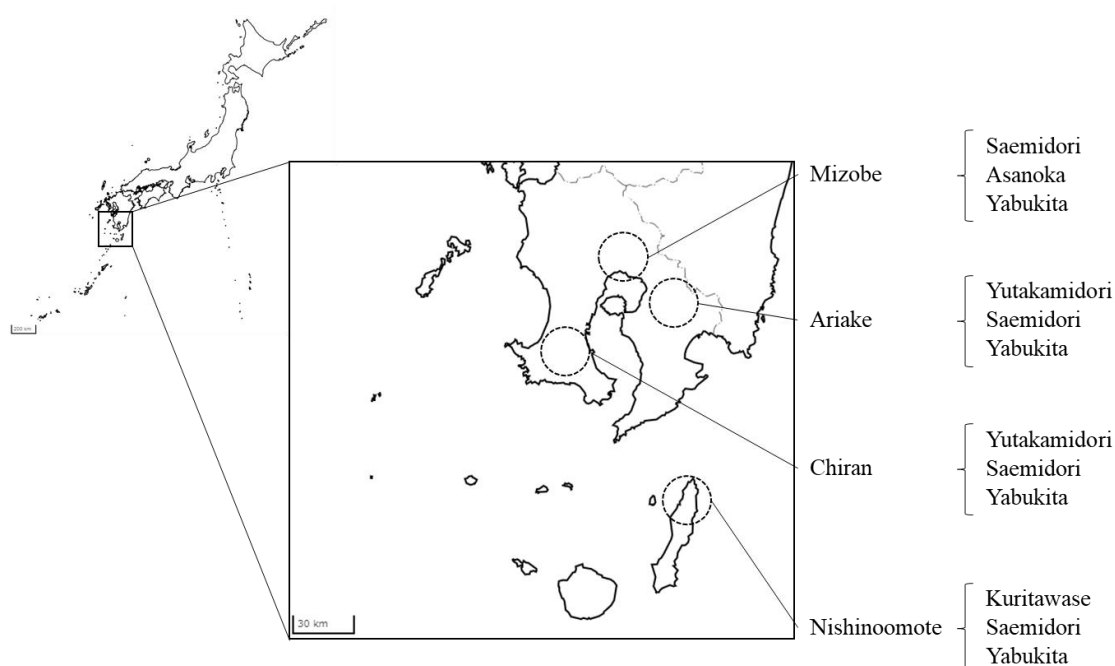

**Figure S1.** Geographic origins of Kagoshima prefecture and breeds of green tea leaves used in this study. The map of Kagoshima was taken from the Geospatial Information Authority of Japan.

**Table S1.** Catechin content of 12 green tea breeds infused by 70% EtOH (25 °C, 24 h). The numerical values with different letters significantly differ ( $p < 0.05$ ) in the same column. In “Means  $\pm$  SD” row, the numerical values with different letters significantly differ ( $p < 0.05$ ).

| Area           | Breed        | Gallate catechins  |                     |                    |                    | Free catechins     |                    |                    |                     |                    | Total catechins     | GC/FC              |
|----------------|--------------|--------------------|---------------------|--------------------|--------------------|--------------------|--------------------|--------------------|---------------------|--------------------|---------------------|--------------------|
|                |              | ECg                | EGCg                | GCg                | Total              | EC                 | EGC                | (+)C               | GC                  | Total              |                     |                    |
| Nishinoomote   | Kuritawase   | 1.20 $\pm$ 0.018i  | 5.21 $\pm$ 0.098h   | 0.03 $\pm$ 0.002ab | 6.44 $\pm$ 0.081f  | 0.82 $\pm$ 0.015e  | 2.12 $\pm$ 0.035f  | 0.12 $\pm$ 0.013b  | 0.12 $\pm$ 0.004bc  | 3.17 $\pm$ 0.048f  | 9.62 $\pm$ 0.181i   | 2.03 $\pm$ 0.005h  |
|                | Saemidori    | 0.91 $\pm$ 0.005ef | 4.39 $\pm$ 0.006f   | 0.12 $\pm$ 0.004g  | 5.42 $\pm$ 0.010d  | 0.57 $\pm$ 0.004ab | 1.81 $\pm$ 0.004cd | 0.09 $\pm$ 0.005ab | 0.12 $\pm$ 0.004cd  | 2.59 $\pm$ 0.000bc | 8.01 $\pm$ 0.015def | 2.09 $\pm$ 0.003i  |
|                | Yabukita     | 1.04 $\pm$ 0.024h  | 4.91 $\pm$ 0.095g   | 0.04 $\pm$ 0.001bc | 5.99 $\pm$ 0.083e  | 0.59 $\pm$ 0.009ab | 1.73 $\pm$ 0.031c  | 0.10 $\pm$ 0.007ab | 0.08 $\pm$ 0.005a   | 2.50 $\pm$ 0.036b  | 8.49 $\pm$ 0.169fgh | 2.4 $\pm$ 0.0001k  |
| Chiran         | Yutakamidori | 0.57 $\pm$ 0.013a  | 2.67 $\pm$ 0.064a   | 0.08 $\pm$ 0.001ef | 3.32 $\pm$ 0.055a  | 0.99 $\pm$ 0.023f  | 2.51 $\pm$ 0.050g  | 0.16 $\pm$ 0.007c  | 0.20 $\pm$ 0.008g   | 3.86 $\pm$ 0.063h  | 7.18 $\pm$ 0.167b   | 0.86 $\pm$ 0.000a  |
|                | Saemidori    | 0.67 $\pm$ 0.009b  | 2.93 $\pm$ 0.041b   | 0.06 $\pm$ 0.002d  | 3.66 $\pm$ 0.036b  | 0.57 $\pm$ 0.007ab | 1.32 $\pm$ 0.017a  | 0.11 $\pm$ 0.005ab | 0.09 $\pm$ 0.003a   | 2.09 $\pm$ 0.023a  | 5.75 $\pm$ 0.084a   | 1.75 $\pm$ 0.002d  |
|                | Yabukita     | 0.86 $\pm$ 0.017de | 4.2 $\pm$ 0.102def  | 0.12 $\pm$ 0.005g  | 5.18 $\pm$ 0.088cd | 0.59 $\pm$ 0.014ab | 1.57 $\pm$ 0.036b  | 0.11 $\pm$ 0.005ab | 0.14 $\pm$ 0.008de  | 2.41 $\pm$ 0.044b  | 7.60 $\pm$ 0.187bcd | 2.15 $\pm$ 0.0030j |
| Ariake         | Yutakamidori | 0.80 $\pm$ 0.010c  | 4.05 $\pm$ 0.054cde | 0.09 $\pm$ 0.001f  | 4.93 $\pm$ 0.047c  | 0.79 $\pm$ 0.013e  | 2.57 $\pm$ 0.016g  | 0.12 $\pm$ 0.007ab | 0.16 $\pm$ 0.006f   | 3.64 $\pm$ 0.030g  | 8.57 $\pm$ 0.108gh  | 1.35 $\pm$ 0.002b  |
|                | Saemidori    | 0.85 $\pm$ 0.013cd | 3.97 $\pm$ 0.066cd  | 0.07 $\pm$ 0.002de | 4.89 $\pm$ 0.057c  | 0.54 $\pm$ 0.007a  | 1.72 $\pm$ 0.027c  | 0.09 $\pm$ 0.003a  | 0.10 $\pm$ 0.002ab  | 2.46 $\pm$ 0.027b  | 7.34 $\pm$ 0.119bc  | 1.99 $\pm$ 0.001g  |
|                | Yabukita     | 0.84 $\pm$ 0.015cd | 4.26 $\pm$ 0.043ef  | 0.08 $\pm$ 0.004ef | 5.18 $\pm$ 0.038cd | 0.59 $\pm$ 0.006b  | 1.91 $\pm$ 0.022de | 0.10 $\pm$ 0.005ab | 0.13 $\pm$ 0.006cde | 2.73 $\pm$ 0.012cd | 7.91 $\pm$ 0.07de   | 1.89 $\pm$ 0.005e  |
| Mizobe         | Saemidori    | 0.96 $\pm$ 0.013fg | 3.90 $\pm$ 0.059c   | 0.05 $\pm$ 0.003c  | 4.91 $\pm$ 0.049c  | 0.73 $\pm$ 0.014d  | 1.96 $\pm$ 0.028e  | 0.10 $\pm$ 0.007ab | 0.10 $\pm$ 0.003ab  | 2.90 $\pm$ 0.022de | 7.81 $\pm$ 0.101cde | 1.7 $\pm$ 0.004c   |
|                | Asanoka      | 1.01 $\pm$ 0.015gh | 4.32 $\pm$ 0.060f   | 0.04 $\pm$ 0.002c  | 5.37 $\pm$ 0.055d  | 0.70 $\pm$ 0.010cd | 1.75 $\pm$ 0.023c  | 0.19 $\pm$ 0.011c  | 0.14 $\pm$ 0.007ef  | 2.79 $\pm$ 0.035d  | 8.16 $\pm$ 0.128efg | 1.93 $\pm$ 0.005f  |
|                | Yabukita     | 0.97 $\pm$ 0.002g  | 4.87 $\pm$ 0.019g   | 0.03 $\pm$ 0.001a  | 5.87 $\pm$ 0.014e  | 0.69 $\pm$ 0.002c  | 2.15 $\pm$ 0.009f  | 0.10 $\pm$ 0.005ab | 0.10 $\pm$ 0.005a   | 3.03 $\pm$ 0.001ef | 8.90 $\pm$ 0.021h   | 1.94 $\pm$ 0.004f  |
| Means $\pm$ SD |              | 0.89 $\pm$ 0.169   | 4.14 $\pm$ 0.745    | 0.07 $\pm$ 0.032   | 5.06 $\pm$ 0.83    | 0.68 $\pm$ 0.134   | 1.93 $\pm$ 0.365   | 0.12 $\pm$ 0.029   | 0.12 $\pm$ 0.035    | 2.95 $\pm$ 0.594   | 7.95 $\pm$ 0.970    | 1.84 $\pm$ 0.384   |

**Table S2.** Catechin content of 12 green tea breeds infused by RT H<sub>2</sub>O (25 °C, 24 h). The numerical values with different letters significantly differ ( $p < 0.05$ ) in the same column. In “Means  $\pm$  SD” row, the numerical values with different letters significantly differ ( $p < 0.05$ ).

| Area           | Breed        | Gallate catechins  |                     |                       |                    | Free catechins     |                     |                      |                    |                     | Total catechins    | GC/FC             |
|----------------|--------------|--------------------|---------------------|-----------------------|--------------------|--------------------|---------------------|----------------------|--------------------|---------------------|--------------------|-------------------|
|                |              | ECg                | EGCg                | GCg                   | Total              | EC                 | EGC                 | (+)C                 | GC                 | Total               |                    |                   |
| Nishinoomote   | Kuritawase   | 0.26 $\pm$ 0.001ef | 1.33 $\pm$ 0.006de  | 0.00 $\pm$ 0.005ab    | 1.59 $\pm$ 0.000de | 0.68 $\pm$ 0.004e  | 1.90 $\pm$ 0.007ef  | 0.08 $\pm$ 0.002bcde | 0.12 $\pm$ 0.001e  | 2.77 $\pm$ 0.011ef  | 4.36 $\pm$ 0.015de | 0.57 $\pm$ 0.002f |
|                | Saemidori    | 0.23 $\pm$ 0.005d  | 1.43 $\pm$ 0.019ef  | 0.03 $\pm$ 0.000gh    | 1.68 $\pm$ 0.017e  | 0.45 $\pm$ 0.006a  | 1.64 $\pm$ 0.023bc  | 0.06 $\pm$ 0.000a    | 0.11 $\pm$ 0.003de | 2.26 $\pm$ 0.023bc  | 3.94 $\pm$ 0.056bc | 0.74 $\pm$ 0.000i |
|                | Yabukita     | 0.27 $\pm$ 0.010f  | 1.75 $\pm$ 0.044i   | 0.01 $\pm$ 0.007abc   | 2.03 $\pm$ 0.033f  | 0.62 $\pm$ 0.014b  | 1.82 $\pm$ 0.046de  | 0.09 $\pm$ 0.005de   | 0.08 $\pm$ 0.005ab | 2.60 $\pm$ 0.050de  | 4.63 $\pm$ 0.117ef | 0.78 $\pm$ 0.002k |
| Chiran         | Yutakamidori | 0.23 $\pm$ 0.003d  | 1.36 $\pm$ 0.003def | 0.04 $\pm$ 0.000h     | 1.63 $\pm$ 0.000e  | 0.83 $\pm$ 0.004g  | 2.65 $\pm$ 0.008h   | 0.13 $\pm$ 0.002g    | 0.23 $\pm$ 0.006h  | 3.84 $\pm$ 0.014i   | 5.46 $\pm$ 0.020h  | 0.42 $\pm$ 0.002b |
|                | Saemidori    | 0.19 $\pm$ 0.012c  | 1.24 $\pm$ 0.057cd  | 0.02 $\pm$ 0.002efg   | 1.45 $\pm$ 0.050cd | 0.45 $\pm$ 0.019sb | 1.38 $\pm$ 0.053a   | 0.08 $\pm$ 0.002abcd | 0.08 $\pm$ 0.004bc | 1.99 $\pm$ 0.055a   | 3.45 $\pm$ 0.149a  | 0.73 $\pm$ 0.005i |
|                | Yabukita     | 0.10 $\pm$ 0.000a  | 0.79 $\pm$ 0.011a   | 0.02 $\pm$ 0.002defg  | 0.91 $\pm$ 0.009a  | 0.66 $\pm$ 0.001de | 2.31 $\pm$ 0.002g   | 0.09 $\pm$ 0.002cde  | 0.15 $\pm$ 0.001f  | 3.21 $\pm$ 0.005g   | 4.13 $\pm$ 0.019cd | 0.28 $\pm$ 0.002a |
| Ariake         | Yutakamidori | 0.22 $\pm$ 0.006d  | 1.38 $\pm$ 0.034ef  | 0.02 $\pm$ 0.002fg    | 1.62 $\pm$ 0.031e  | 0.75 $\pm$ 0.018f  | 2.54 $\pm$ 0.059h   | 0.10 $\pm$ 0.004f    | 0.17 $\pm$ 0.000g  | 3.57 $\pm$ 0.057h   | 5.19 $\pm$ 0.124gh | 0.46 $\pm$ 0.001c |
|                | Saemidori    | 0.18 $\pm$ 0.007c  | 1.17 $\pm$ 0.046c   | 0.02 $\pm$ 0.002cdef  | 1.37 $\pm$ 0.039c  | 0.53 $\pm$ 0.019c  | 1.78 $\pm$ 0.065cde | 0.07 $\pm$ 0.003abc  | 0.09 $\pm$ 0.005cd | 2.48 $\pm$ 0.065cd  | 3.85 $\pm$ 0.147bc | 0.56 $\pm$ 0.001e |
|                | Yabukita     | 0.15 $\pm$ 0.002b  | 1.04 $\pm$ 0.020b   | 0.01 $\pm$ 0.004abcde | 1.20 $\pm$ 0.019b  | 0.52 $\pm$ 0.012c  | 1.74 $\pm$ 0.032bcd | 0.07 $\pm$ 0.001abcd | 0.11 $\pm$ 0.003e  | 2.45 $\pm$ 0.033bcd | 3.65 $\pm$ 0.073ab | 0.49 $\pm$ 0.001d |
| Mizobe         | Saemidori    | 0.30 $\pm$ 0.011g  | 1.59 $\pm$ 0.054gh  | 0.02 $\pm$ 0.002bcdef | 1.91 $\pm$ 0.047f  | 0.68 $\pm$ 0.023e  | 2.03 $\pm$ 0.059f   | 0.09 $\pm$ 0.000e    | 0.10 $\pm$ 0.000d  | 2.90 $\pm$ 0.058f   | 4.81 $\pm$ 0.149f  | 0.66 $\pm$ 0.003g |
|                | Asanoka      | 0.32 $\pm$ 0.003g  | 1.71 $\pm$ 0.017hi  | 0.01 $\pm$ 0.001abcd  | 2.04 $\pm$ 0.014f  | 0.66 $\pm$ 0.008de | 1.91 $\pm$ 0.019ef  | 0.16 $\pm$ 0.008h    | 0.17 $\pm$ 0.003g  | 2.90 $\pm$ 0.011f   | 4.94 $\pm$ 0.035fg | 0.7 $\pm$ 0.002h  |
|                | Yabukita     | 0.23 $\pm$ 0.004de | 1.47 $\pm$ 0.010fg  | 0a                    | 1.70 $\pm$ 0.010e  | 0.50 $\pm$ 0.000bc | 1.60 $\pm$ 0.005b   | 0.07 $\pm$ 0.000ab   | 0.07 $\pm$ 0.000a  | 2.23 $\pm$ 0.003b   | 3.94 $\pm$ 0.010bc | 0.76 $\pm$ 0.006j |
| Means $\pm$ SD |              | 0.22 $\pm$ 0.061   | 1.35 $\pm$ 0.274    | 0.02 $\pm$ 0.011      | 1.57 $\pm$ 0.316   | 0.61 $\pm$ 0.121   | 1.94 $\pm$ 0.383    | 0.09 $\pm$ 0.027     | 0.12 $\pm$ 0.047   | 2.83 $\pm$ 0.557    | 4.36 $\pm$ 0.642   | 0.60 $\pm$ 0.152  |

**Table S3.** Catechin content of 12 green tea breeds infused by Hot H<sub>2</sub>O (90 °C, 1.5 min). The numerical values with different letters significantly differ ( $p < 0.05$ ) in the same column. In “Means  $\pm$  SD” row, the numerical values with different letters significantly differ ( $p < 0.05$ ).

| Area           | Breed        | Gallate catechins   |                    |                      |                    | Free catechins     |                     |                     |                     |                    | Total catechins    | GC/FC               |
|----------------|--------------|---------------------|--------------------|----------------------|--------------------|--------------------|---------------------|---------------------|---------------------|--------------------|--------------------|---------------------|
|                |              | ECg                 | EGCg               | GCg                  | Total              | EC                 | EGC                 | (+)C                | GC                  | Total              |                    |                     |
| Nishinoomote   | Kuritawase   | 0.16 $\pm$ 0.036a   | 0.66 $\pm$ 0.142a  | 0.02 $\pm$ 0.008abc  | 0.84 $\pm$ 0.149a  | 0.29 $\pm$ 0.029ab | 0.68 $\pm$ 0.063a   | 0.05 $\pm$ 0.006ab  | 0.06 $\pm$ 0.011ab  | 1.09 $\pm$ 0.079a  | 1.93 $\pm$ 0.279a  | 0.76 $\pm$ 0.086abc |
|                | Saemidori    | 0.22 $\pm$ 0.040abc | 1.29 $\pm$ 0.237bc | 0.04 $\pm$ 0.009de   | 1.55 $\pm$ 0.234bc | 0.30 $\pm$ 0.050ab | 1.09 $\pm$ 0.176cd  | 0.04 $\pm$ 0.015a   | 0.08 $\pm$ 0.014bcd | 1.52 $\pm$ 0.206bc | 3.06 $\pm$ 0.538bc | 1.02 $\pm$ 0.016e   |
|                | Yabukita     | 0.18 $\pm$ 0.015ab  | 1.04 $\pm$ 0.086ab | 0.02 $\pm$ 0.004a    | 1.24 $\pm$ 0.086ab | 0.28 $\pm$ 0.009ab | 0.92 $\pm$ 0.032abc | 0.05 $\pm$ 0.002ab  | 0.05 $\pm$ 0.002a   | 1.30 $\pm$ 0.034ab | 2.54 $\pm$ 0.141ab | 0.95 $\pm$ 0.049e   |
| Chiran         | Yutakamidori | 0.20 $\pm$ 0.022ab  | 1.17 $\pm$ 0.129b  | 0.05 $\pm$ 0.007ef   | 1.42 $\pm$ 0.129b  | 0.45 $\pm$ 0.032c  | 1.55 $\pm$ 0.103e   | 0.08 $\pm$ 0.007cd  | 0.14 $\pm$ 0.012f   | 2.22 $\pm$ 0.124b  | 3.64 $\pm$ 0.306c  | 0.64 $\pm$ 0.027a   |
|                | Saemidori    | 0.20 $\pm$ 0.026ab  | 1.15 $\pm$ 0.142b  | 0.03 $\pm$ 0.005bcde | 1.38 $\pm$ 0.141b  | 0.27 $\pm$ 0.024a  | 0.81 $\pm$ 0.071ab  | 0.05 $\pm$ 0.014ab  | 0.06 $\pm$ 0.006ab  | 1.18 $\pm$ 0.090b  | 2.57 $\pm$ 0.279ab | 1.17 $\pm$ 0.044f   |
|                | Yabukita     | 0.28 $\pm$ 0.009c   | 1.63 $\pm$ 0.055c  | 0.06 $\pm$ 0.002f    | 1.97 $\pm$ 0.053c  | 0.33 $\pm$ 0.010ab | 1.05 $\pm$ 0.036bcd | 0.06 $\pm$ 0.005bcd | 0.10 $\pm$ 0.004de  | 1.54 $\pm$ 0.043c  | 3.51 $\pm$ 0.117c  | 1.28 $\pm$ 0.006f   |
| Ariake         | Yutakamidori | 0.20 $\pm$ 0.036ab  | 1.16 $\pm$ 0.213b  | 0.04 $\pm$ 0.005bcde | 1.40 $\pm$ 0.207b  | 0.45 $\pm$ 0.045c  | 1.52 $\pm$ 0.202e   | 0.07 $\pm$ 0.006cd  | 0.11 $\pm$ 0.013e   | 2.15 $\pm$ 0.217b  | 3.55 $\pm$ 0.517b  | 0.65 $\pm$ 0.033ab  |
|                | Saemidori    | 0.21 $\pm$ 0.014ab  | 1.17 $\pm$ 0.070b  | 0.03 $\pm$ 0.004abcd | 1.41 $\pm$ 0.071b  | 0.31 $\pm$ 0.015ab | 1.12 $\pm$ 0.063cd  | 0.05 $\pm$ 0.006ab  | 0.07 $\pm$ 0.006abc | 1.55 $\pm$ 0.067b  | 2.96 $\pm$ 0.168b  | 0.9 $\pm$ 0.014de   |
|                | Yabukita     | 0.21 $\pm$ 0.014abc | 1.30 $\pm$ 0.087bc | 0.04 $\pm$ 0.005cde  | 1.54 $\pm$ 0.087bc | 0.33 $\pm$ 0.008ab | 1.18 $\pm$ 0.045cd  | 0.06 $\pm$ 0.002abc | 0.09 $\pm$ 0.005cde | 1.66 $\pm$ 0.045bc | 3.21 $\pm$ 0.159bc | 0.93 $\pm$ 0.029e   |
| Mizobe         | Saemidori    | 0.19 $\pm$ 0.014ab  | 0.93 $\pm$ 0.085ab | 0.02 $\pm$ 0.001a    | 1.13 $\pm$ 0.081ab | 0.32 $\pm$ 0.013ab | 1.02 $\pm$ 0.085bcd | 0.05 $\pm$ 0.003ab  | 0.06 $\pm$ 0.002a   | 1.44 $\pm$ 0.078ab | 2.57 $\pm$ 0.194ab | 0.79 $\pm$ 0.016bcd |
|                | Asanoka      | 0.24 $\pm$ 0.020bc  | 1.17 $\pm$ 0.106b  | 0.02 $\pm$ 0.004abc  | 1.44 $\pm$ 0.105b  | 0.31 $\pm$ 0.010ab | 0.99 $\pm$ 0.036bcd | 0.08 $\pm$ 0.006b   | 0.08 $\pm$ 0.003bcd | 1.47 $\pm$ 0.043b  | 2.90 $\pm$ 0.181bc | 0.98 $\pm$ 0.044e   |
|                | Yabukita     | 0.22 $\pm$ 0.011abc | 1.29 $\pm$ 0.059bc | 0.02 $\pm$ 0.002ab   | 1.53 $\pm$ 0.059bc | 0.36 $\pm$ 0.011b  | 1.22 $\pm$ 0.047d   | 0.06 $\pm$ 0.005abc | 0.06 $\pm$ 0.004ab  | 1.70 $\pm$ 0.053bc | 3.22 $\pm$ 0.123bc | 0.9 $\pm$ 0.029cde  |
| Means $\pm$ SD |              | 0.21 $\pm$ 0.031    | 1.16 $\pm$ 0.231   | 0.03 $\pm$ 0.012     | 1.36 $\pm$ 0.293   | 0.33 $\pm$ 0.059   | 1.10 $\pm$ 0.255    | 0.06 $\pm$ 0.013    | 0.08 $\pm$ 0.027    | 1.57 $\pm$ 0.313   | 2.97 $\pm$ 0.506   | 0.90 $\pm$ 0.182    |
